# Supplementary material for: Myeloid deficiency of the intrinsic clock protein BMAL1 accelerates cognitive aging by disrupting microglial synaptic pruning
Source: J Neuroinflammation. 2023 Feb 24;20:48. doi: 10.1186/s12974-023-02727-8 (PMC9951430; doi:10.1186/s12974-023-02727-8)
Supplement: Supplementary file 2 — Additional file 2. Functional enrichments among genes downregulated in Bmal1 cKO. [file 12974_2023_2727_MOESM2_ESM.xlsx]

## Sheet: Legend
Functional enrichments among genes down-regulated in Bmal1 cKO.
Each table shows the results of statistical overrepresentation analysis performed via PANTHER on the gene ontology (GO) biological process (A), cellular component (B) or molecular function (C).
For each ontology, overrepresentation was calculated for the genes down-regulated in Bmal1 cKO at age group separatedly.
Only functional annotations with at least three occurences among down-regulated genes in the corresponding comparison were considered. NA indicates when this criterion was not met and so the test was not considered.
Columns:
term	The name of the GO term with the GO ID in parenthesis.
n_present	The number of times the corresponding GO term appeared among significantly down-regulated genes in Bmal1 cKO mice of the corresponding age group.
fold_enrichment	The fold-enrichment (observed/expected) estimate from PANTHER statistical overrepresentation test.
p-value	The p-value from the statistical overrepresentation test from PANTHER.
FDR	The adjusted p-value (Benjamini-Hochberg method) to correct for multiple testing.

## Sheet: A) Biological function
	Aged				Young
GO Terms	n_present	fold_enrichment	p-value	FDR	n_present	fold_enrichment	p-value	FDR
suppression of viral release by host (GO:0044790)	3	> 100	1.12e-07	0.0017	3	> 100	3.28e-08	0.000497
regulation of lipopolysaccharide-mediated signaling pathway (GO:0031664)	3	> 100	3.79e-07	0.00287	3	> 100	1.11e-07	0.00084
negative regulation of viral entry into host cell (GO:0046597)	3	> 100	4.98e-07	0.00251	3	> 100	1.46e-07	0.000735
negative regulation of viral life cycle (GO:1903901)	3	> 100	6.39e-07	0.00242	3	> 100	1.87e-07	0.000708
regulation of viral entry into host cell (GO:0046596)	3	> 100	1.75e-06	0.0053	3	> 100	5.13e-07	0.00155
modulation by symbiont of entry into host (GO:0052372)	3	> 100	2.61e-06	0.00658	3	> 100	7.65e-07	0.00193
protein K63-linked ubiquitination (GO:0070534)	3	> 100	3.01e-06	0.00652	3	> 100	8.85e-07	0.00191
regulation of biological process involved in symbiotic interaction (GO:0043903)	3	97.22	3.95e-06	0.00749	3	> 100	1.16e-06	0.0022
activation of innate immune response (GO:0002218)	3	89.12	5.07e-06	0.00853	3	> 100	1.49e-06	0.00251
negative regulation of viral process (GO:0048525)	3	55.55	1.98e-05	0.0273	3	79.38	5.84e-06	0.00805
positive regulation of I-kappaB kinase/NF-kappaB signaling (GO:0043123)	3	40.74	4.87e-05	0.0614	3	58.21	1.44e-05	0.0168
regulation of viral life cycle (GO:1903900)	3	38.19	5.87e-05	0.0684	3	54.57	1.74e-05	0.0189
activation of immune response (GO:0002253)	4	30.18	6.39e-06	0.00968	3	32.17	8.19e-05	0.0539
positive regulation of innate immune response (GO:0045089)	3	35.65	7.18e-05	0.0776	3	50.94	2.13e-05	0.0215
regulation of viral process (GO:0050792)	3	33.16	8.86e-05	0.0894	3	47.38	2.64e-05	0.0249
positive regulation of NF-kappaB transcription factor activity (GO:0051092)	3	33.16	8.86e-05	0.0838	3	47.38	2.64e-05	0.0235
positive regulation of autophagy (GO:0010508)	3	33.16	8.86e-05	0.0789	3	47.38	2.64e-05	0.0222
positive regulation of response to biotic stimulus (GO:0002833)	3	28.33	0.00014	0.112	3	40.48	4.18e-05	0.0333
regulation of I-kappaB kinase/NF-kappaB signaling (GO:0043122)	3	26.24	0.000175	0.132	3	37.5	5.23e-05	0.0396
defense response to symbiont (GO:0140546)	3	23.5	0.000241	0.174	3	33.58	7.22e-05	0.0521
defense response to virus (GO:0051607)	3	23.5	0.000241	0.166	3	33.58	7.22e-05	0.0497
regulation of innate immune response (GO:0045088)	3	22.4	0.000277	0.182	3	32	8.32e-05	0.0525
protein polyubiquitination (GO:0000209)	3	22.28	0.000281	0.177	3	31.83	8.45e-05	0.0512
positive regulation of DNA-binding transcription factor activity (GO:0051091)	3	19.53	0.000411	0.249	3	27.91	0.000124	0.0723
regulation of autophagy (GO:0010506)	3	17.04	0.00061	0.289	4	32.6	3.29e-06	0.00498
autophagy (GO:0006914)	3	18.44	0.000486	0.283	3	26.35	0.000147	0.0824
process utilizing autophagic mechanism (GO:0061919)	3	18.44	0.000486	0.272	3	26.35	0.000147	0.0795
response to virus (GO:0009615)	3	18.36	0.000492	0.257	3	26.23	0.000149	0.0777
positive regulation of defense response (GO:0031349)	3	17.53	0.000562	0.284	3	25.05	0.00017	0.0832
positive regulation of immune response (GO:0050778)	4	14.48	0.00011	0.0922	3	15.47	0.000693	0.25
regulation of response to biotic stimulus (GO:0002831)	3	14.9	0.000897	0.399	3	21.3	0.000274	0.13
regulation of response to stress (GO:0080134)	5	6.25	0.000593	0.289	4	7.14	0.00119	0.327
regulation of DNA-binding transcription factor activity (GO:0051090)	3	12.05	0.00165	0.675	3	17.22	0.000509	0.203
positive regulation of response to external stimulus (GO:0032103)	3	11.75	0.00177	0.705	3	16.79	0.000547	0.207
positive regulation of cellular catabolic process (GO:0031331)	3	11.32	0.00197	0.765	3	16.17	0.00061	0.225
regulation of MAPK cascade (GO:0043408)	4	9.78	0.000488	0.264	3	10.47	0.00214	0.484
positive regulation of MAPK cascade (GO:0043410)	3	10.23	0.00262	0.945	3	14.62	0.000817	0.281
protein ubiquitination (GO:0016567)	3	10.02	0.00278	0.958	3	14.31	0.000869	0.292
positive regulation of catabolic process (GO:0009896)	3	9.93	0.00286	0.962	3	14.18	0.000893	0.294
regulation of immune response (GO:0050776)	4	8.58	0.000802	0.368	3	9.18	0.00312	0.597
protein modification by small protein conjugation (GO:0032446)	3	9.14	0.00361	1	3	13.06	0.00113	0.324
positive regulation of immune system process (GO:0002684)	4	7.98	0.00105	0.455	3	8.54	0.00383	0.716
innate immune response (GO:0045087)	3	9.02	0.00374	1	3	12.9	0.00118	0.33
regulation of defense response (GO:0031347)	3	8.47	0.00446	1	3	12.1	0.00141	0.381
protein modification by small protein conjugation or removal (GO:0070647)	3	7.24	0.00692	1	3	10.34	0.00222	0.486
defense response (GO:0006952)	4	6.21	0.00267	0.939	3	6.64	0.00775	1
regulation of cellular catabolic process (GO:0031329)	3	6.25	0.0103	1	4	11.93	0.000166	0.0838
defense response to other organism (GO:0098542)	3	6.67	0.00865	1	3	9.54	0.00279	0.557
regulation of intracellular signal transduction (GO:1902531)	4	4.26	0.0103	1	4	6.09	0.00217	0.482
positive regulation of intracellular signal transduction (GO:1902533)	3	5.33	0.016	1	4	10.16	0.000308	0.141
regulation of catabolic process (GO:0009894)	3	5.29	0.0163	1	5	12.62	1.12e-05	0.0142
regulation of response to stimulus (GO:0048583)	6	2.71	0.0108	1	5	3.23	0.00747	1
regulation of response to external stimulus (GO:0032101)	3	5.58	0.0141	1	3	7.97	0.00465	0.829
response to stress (GO:0006950)	5	2.93	0.0171	1	5	4.19	0.00224	0.486
regulation of protein localization (GO:0032880)	3	5.42	0.0152	1	3	7.75	0.00504	0.877
regulation of immune system process (GO:0002682)	4	4.92	0.00618	1	3	5.27	0.0147	1
response to other organism (GO:0051707)	3	4.8	0.0212	1	4	9.15	0.000462	0.2
response to external biotic stimulus (GO:0043207)	3	4.79	0.0212	1	4	9.14	0.000464	0.195
immune response (GO:0006955)	3	5.14	0.0176	1	3	7.34	0.00587	0.999
response to biotic stimulus (GO:0009607)	3	4.63	0.0232	1	4	8.83	0.000529	0.205
positive regulation of response to stimulus (GO:0048584)	4	3.27	0.0257	1	5	5.84	0.000466	0.191
biological process involved in interspecies interaction between organisms (GO:0044419)	3	4.29	0.0283	1	4	8.19	0.000704	0.248
immune system process (GO:0002376)	4	3.73	0.0164	1	3	3.99	0.0312	1
positive regulation of signal transduction (GO:0009967)	3	3.39	0.0521	1	4	6.46	0.00173	0.41
positive regulation of molecular function (GO:0044093)	3	3.42	0.0507	1	3	4.89	0.0181	1
positive regulation of cell communication (GO:0010647)	3	2.99	0.0711	1	4	5.7	0.00278	0.561
positive regulation of signaling (GO:0023056)	3	2.97	0.0718	1	4	5.67	0.00282	0.555
cellular catabolic process (GO:0044248)	3	3.3	0.0554	1	3	4.72	0.0199	1
regulation of nucleobase-containing compound metabolic process (GO:0019219)	5	2.33	0.0433	1	4	2.67	0.0423	1
regulation of signal transduction (GO:0009966)	4	2.39	0.0706	1	4	3.42	0.0179	1
response to external stimulus (GO:0009605)	3	2.62	0.0978	1	5	6.24	0.000341	0.152
catabolic process (GO:0009056)	3	2.91	0.0757	1	3	4.16	0.0279	1
cellular protein modification process (GO:0006464)	4	2.82	0.0421	1	3	3.02	0.0645	1
protein modification process (GO:0036211)	4	2.82	0.0421	1	3	3.02	0.0645	1
regulation of molecular function (GO:0065009)	4	2.77	0.0445	1	3	2.96	0.0674	1
regulation of cellular metabolic process (GO:0031323)	6	1.86	0.0862	1	5	2.22	0.0393	1
macromolecule modification (GO:0043412)	4	2.62	0.0527	1	3	2.81	0.0769	1
regulation of cell communication (GO:0010646)	4	2.08	0.109	1	4	2.97	0.0294	1
regulation of signaling (GO:0023051)	4	2.07	0.109	1	4	2.96	0.0296	1
regulation of localization (GO:0032879)	4	2.38	0.0713	1	3	2.55	0.0975	1
regulation of transcription, DNA-templated (GO:0006355)	4	2.24	0.0859	1	3	2.4	0.113	1
regulation of nucleic acid-templated transcription (GO:1903506)	4	2.24	0.0864	1	3	2.4	0.113	1
regulation of RNA biosynthetic process (GO:2001141)	4	2.23	0.0871	1	3	2.39	0.114	1
response to stimulus (GO:0050896)	6	1.61	0.19	1	6	2.29	0.013	1
cellular protein metabolic process (GO:0044267)	4	2.19	0.0931	1	3	2.34	0.12	1
organonitrogen compound metabolic process (GO:1901564)	5	1.89	0.143	1	4	2.16	0.0852	1
regulation of RNA metabolic process (GO:0051252)	4	2.04	0.114	1	3	2.19	0.141	1
cellular macromolecule metabolic process (GO:0044260)	5	2.16	0.0583	1	3	1.85	0.206	1
negative regulation of biological process (GO:0048519)	6	1.98	0.0766	1	4	1.89	0.21	1
regulation of nitrogen compound metabolic process (GO:0051171)	6	1.98	0.0766	1	4	1.89	0.21	1
regulation of macromolecule biosynthetic process (GO:0010556)	4	1.95	0.131	1	3	2.08	0.158	1
nitrogen compound metabolic process (GO:0006807)	7	1.99	0.0398	1	4	1.62	0.251	1
regulation of metabolic process (GO:0019222)	6	1.66	0.184	1	5	1.98	0.107	1
regulation of primary metabolic process (GO:0080090)	6	1.92	0.0805	1	4	1.83	0.215	1
regulation of macromolecule metabolic process (GO:0060255)	6	1.81	0.0924	1	4	1.72	0.23	1
positive regulation of cellular process (GO:0048522)	5	1.53	0.311	1	5	2.19	0.0413	1
protein metabolic process (GO:0019538)	4	1.9	0.234	1	3	2.03	0.167	1
regulation of cellular biosynthetic process (GO:0031326)	4	1.85	0.238	1	3	1.99	0.176	1
regulation of biosynthetic process (GO:0009889)	4	1.81	0.242	1	3	1.94	0.185	1
positive regulation of cellular metabolic process (GO:0031325)	3	1.61	0.409	1	4	3.06	0.0262	1
positive regulation of biological process (GO:0048518)	5	1.42	0.338	1	5	2.03	0.105	1
primary metabolic process (GO:0044238)	7	1.85	0.0491	1	4	1.51	0.438	1
cellular metabolic process (GO:0044237)	7	1.82	0.0523	1	4	1.48	0.44	1
positive regulation of metabolic process (GO:0009893)	3	1.4	0.455	1	4	2.67	0.042	1
organic substance metabolic process (GO:0071704)	7	1.73	0.102	1	4	1.41	0.451	1
metabolic process (GO:0008152)	7	1.64	0.11	1	4	1.34	0.47	1
regulation of gene expression (GO:0010468)	4	1.55	0.294	1	3	1.66	0.384	1
macromolecule metabolic process (GO:0043170)	6	1.92	0.0808	1	3	1.37	0.685	1
biological_process (GO:0008150)	10	1.03	1	1	6	0.89	0.206	1
regulation of cellular process (GO:0050794)	7	1.23	0.531	1	5	1.25	0.706	1
regulation of biological process (GO:0050789)	7	1.17	0.749	1	5	1.2	0.709	1
cellular process (GO:0009987)	9	1.17	0.472	1	6	1.11	1	1
biological regulation (GO:0065007)	7	1.12	0.753	1	5	1.14	1	1
system process (GO:0003008)	3	3.54	0.0465	1	NA	NA	NA	NA
animal organ development (GO:0048513)	4	2.31	0.0781	1	NA	NA	NA	NA
anatomical structure morphogenesis (GO:0009653)	3	2.35	0.126	1	NA	NA	NA	NA
negative regulation of nitrogen compound metabolic process (GO:0051172)	3	2.3	0.132	1	NA	NA	NA	NA
negative regulation of cellular metabolic process (GO:0031324)	3	2.16	0.151	1	NA	NA	NA	NA
nucleobase-containing compound metabolic process (GO:0006139)	3	2.13	0.156	1	NA	NA	NA	NA
heterocycle metabolic process (GO:0046483)	3	2.03	0.175	1	NA	NA	NA	NA
cellular aromatic compound metabolic process (GO:0006725)	3	1.99	0.182	1	NA	NA	NA	NA
negative regulation of macromolecule metabolic process (GO:0010605)	3	1.98	0.183	1	NA	NA	NA	NA
organic cyclic compound metabolic process (GO:1901360)	3	1.86	0.209	1	NA	NA	NA	NA
negative regulation of metabolic process (GO:0009892)	3	1.82	0.219	1	NA	NA	NA	NA
system development (GO:0048731)	4	1.9	0.234	1	NA	NA	NA	NA
multicellular organism development (GO:0007275)	4	1.61	0.278	1	NA	NA	NA	NA
cellular nitrogen compound metabolic process (GO:0034641)	3	1.66	0.401	1	NA	NA	NA	NA
cell differentiation (GO:0030154)	3	1.59	0.411	1	NA	NA	NA	NA
cellular developmental process (GO:0048869)	3	1.58	0.414	1	NA	NA	NA	NA
anatomical structure development (GO:0048856)	4	1.43	0.481	1	NA	NA	NA	NA
developmental process (GO:0032502)	4	1.33	0.501	1	NA	NA	NA	NA
multicellular organismal process (GO:0032501)	4	1.21	0.738	1	NA	NA	NA	NA
negative regulation of cellular process (GO:0048523)	3	1.08	1	1	NA	NA	NA	NA
cellular response to chemical stimulus (GO:0070887)	NA	NA	NA	NA	3	3.22	0.0545	1
response to chemical (GO:0042221)	NA	NA	NA	NA	3	2.36	0.118	1
cellular response to stimulus (GO:0051716)	NA	NA	NA	NA	3	1.43	0.434	1

## Sheet: B) Cellular component
	Aged				Young
term	n_present	fold_enrichment	p-value	FDR	n_present	fold_enrichment	p-value	FDR
omegasome (GO:1990462)	3	> 100	1.39e-08	2.76e-05	3	> 100	4.04e-09	8.06e-06
P-body (GO:0000932)	3	61.11	1.5e-05	0.00748	3	87.32	4.43e-06	0.00441
cytoplasmic ribonucleoprotein granule (GO:0036464)	4	30.18	6.39e-06	0.00637	3	32.17	8.19e-05	0.0544
ribonucleoprotein granule (GO:0035770)	4	27.69	8.93e-06	0.00593	3	29.53	0.000105	0.0524
supramolecular complex (GO:0099080)	4	5.6	0.00387	1	4	8.01	0.000768	0.306
cytosol (GO:0005829)	7	3.09	0.00192	0.766	4	2.52	0.0513	1
nuclear lumen (GO:0031981)	5	2.09	0.0663	1	5	2.99	0.0106	1
nucleoplasm (GO:0005654)	5	2.33	0.0436	1	4	2.66	0.0426	1
intracellular non-membrane-bounded organelle (GO:0043232)	6	2.33	0.0229	1	4	2.22	0.078	1
non-membrane-bounded organelle (GO:0043228)	6	2.33	0.023	1	4	2.22	0.0781	1
intracellular organelle lumen (GO:0070013)	5	1.88	0.143	1	5	2.69	0.0169	1
organelle lumen (GO:0043233)	5	1.88	0.143	1	5	2.69	0.0169	1
membrane-enclosed lumen (GO:0031974)	5	1.88	0.143	1	5	2.69	0.0169	1
nucleus (GO:0005634)	6	1.46	0.336	1	6	2.08	0.0221	1
cellular anatomical entity (GO:0110165)	8	0.87	0.179	1	6	0.93	0.432	1
endomembrane system (GO:0012505)	3	1.29	0.707	1	4	2.45	0.0561	1
intracellular membrane-bounded organelle (GO:0043231)	8	1.23	0.51	1	6	1.32	0.434	1
cytoplasm (GO:0005737)	8	1.25	0.511	1	6	1.34	0.434	1
membrane-bounded organelle (GO:0043227)	8	1.19	0.515	1	6	1.27	0.439	1
intracellular organelle (GO:0043229)	8	1.13	0.733	1	6	1.21	0.681	1
organelle (GO:0043226)	8	1.11	0.736	1	6	1.19	0.682	1
cellular_component (GO:0005575)	10	1.03	1	1	7	1.03	1	1
intracellular anatomical structure (GO:0005622)	8	1.02	1	1	6	1.09	1	1
membrane (GO:0016020)	3	0.66	0.362	1	NA	NA	NA	NA

## Sheet: C) Molecular function
	Aged				Young
term	n_present	fold_enrichment	p-value	FDR	n_present	fold_enrichment	p-value	FDR
pattern recognition receptor activity (GO:0038187)	3	> 100	5.66e-07	0.00257	3	> 100	1.66e-07	0.000752
transcription coactivator activity (GO:0003713)	3	19.8	0.000395	0.449	3	28.3	0.000119	0.271
ubiquitin-protein transferase activity (GO:0004842)	4	16.58	6.5e-05	0.148	3	17.72	0.000468	0.304
ubiquitin-like protein transferase activity (GO:0019787)	4	15.8	7.83e-05	0.119	3	16.88	0.000538	0.306
protein-macromolecule adaptor activity (GO:0030674)	3	16.98	0.000617	0.561	3	24.26	0.000187	0.284
ubiquitin protein ligase activity (GO:0061630)	3	16.27	0.000698	0.529	3	23.24	0.000212	0.241
ubiquitin-like protein ligase activity (GO:0061659)	3	15.61	0.000785	0.51	3	22.31	0.000239	0.217
molecular adaptor activity (GO:0060090)	3	13.84	0.00111	0.63	3	19.78	0.00034	0.257
transcription coregulator activity (GO:0003712)	3	10.72	0.0023	1	3	15.32	0.000714	0.361
protein homodimerization activity (GO:0042803)	3	7.05	0.00745	1	3	10.07	0.00239	0.836
transferase activity (GO:0016740)	5	3.91	0.00495	1	4	4.47	0.00681	1
protein kinase binding (GO:0019901)	3	6.37	0.00985	1	3	9.1	0.0032	1
kinase binding (GO:0019900)	3	5.69	0.0134	1	3	8.13	0.0044	1
signaling receptor activity (GO:0038023)	3	5.68	0.0134	1	3	8.12	0.00442	1
molecular transducer activity (GO:0060089)	3	5.68	0.0134	1	3	8.12	0.00442	1
protein dimerization activity (GO:0046983)	3	5.14	0.0176	1	3	7.35	0.00585	1
catalytic activity, acting on a protein (GO:0140096)	5	4.02	0.00439	1	3	3.44	0.046	1
identical protein binding (GO:0042802)	5	3.78	0.00577	1	3	3.23	0.054	1
transcription regulator activity (GO:0140110)	3	3.08	0.0657	1	3	4.41	0.0239	1
catalytic activity (GO:0003824)	6	1.96	0.078	1	5	2.33	0.0317	1
enzyme binding (GO:0019899)	3	2.21	0.144	1	4	4.22	0.00842	1
protein binding (GO:0005515)	7	1.36	0.346	1	6	1.66	0.126	1
binding (GO:0005488)	8	1.11	0.736	1	7	1.38	0.201	1
ion binding (GO:0043167)	4	1.32	0.503	1	3	1.41	0.44	1
molecular_function (GO:0003674)	10	1.04	1	1	7	1.04	1	1
